# Supplementary material
Source: Springer Nature journal article supplement (https://www.springermedizin.de/resource/supplementary/12936_2007_443_MOESM2_ESM.pdf/9547458)

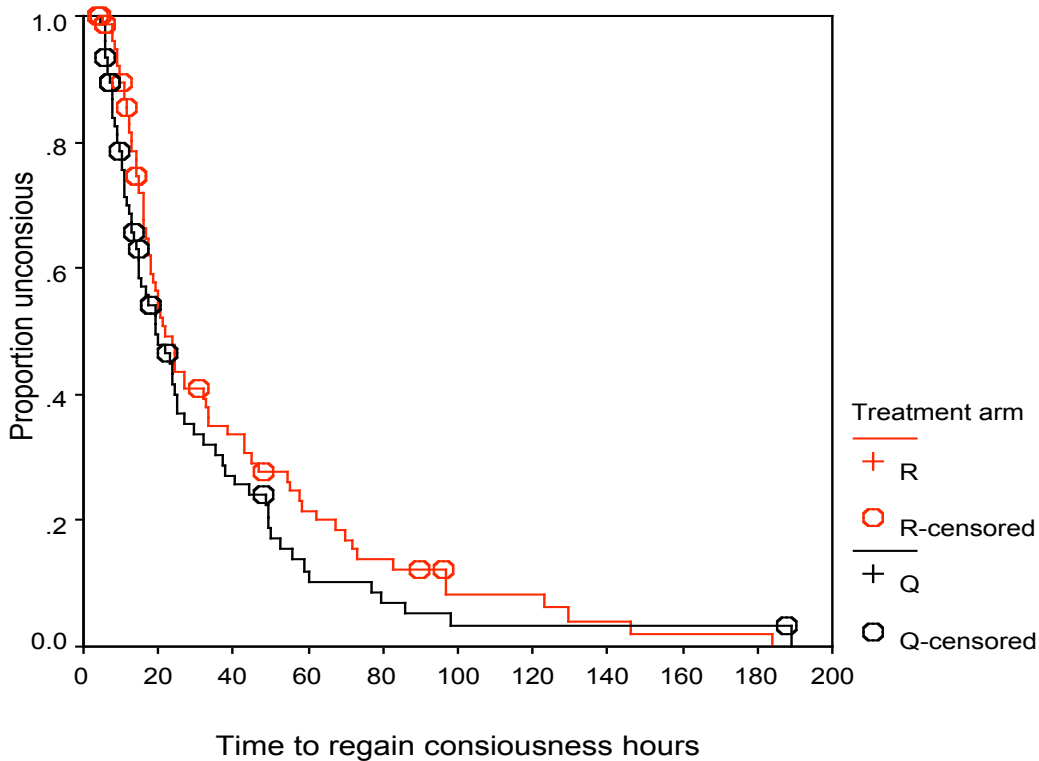

P value= 0.22, Log Rank test  
*Q= Mannitol, R=Placebo*

Supplement: MOESM2 [file 9547458]
